# Supplementary material for: Oncologic outcomes of patients with resectable primary gastric squamous cell carcinoma: a systematic review
Source: PubMed Central journal article supplement — Ann Gastroenterol. 2022 May 12;35(4):376–82. doi: 10.20524/aog.2022.0715 (PMC9210788; doi:10.20524/aog.2022.0715), 2022-05-12
Supplement: AnnGastroenterol-35-376_Suppl1.pdf [file AnnGastroenterol-35-376_Suppl1.pdf]

## Supplementary material

**Supplementary Table 1** Included studies and relevant information

| First author [ref.]               | PMID     | Publication date | Type of study |
|-----------------------------------|----------|------------------|---------------|
| Gao <i>et al</i> [13]             | 32899097 | 2020             | Case Report   |
| Yamagata <i>et al</i> [14]        | 30890174 | 2019             | Case Report   |
| Rojas <i>et al</i> [1]            | 29850384 | 2019             | Case Report   |
| Vailas <i>et al</i> [15]          | 31255175 | 2019             | Case Report   |
| Gonzalez-Sanchez <i>et al</i> [2] | 28469507 | 2017             | Case Report   |
| Chang <i>et al</i> [16]           | 27433399 | 2016             | Case Report   |
| Gao <i>et al</i> [17]             | 26464735 | 2015             | Case Report   |
| Hwang <i>et al</i> [9]            | 25289093 | 2014             | Case Report   |
| Wang <i>et al</i> [18]            | 24944669 | 2014             | Case Report   |
| Chen <i>et al</i> [11]            | 27478431 | 2016             | Case Series   |
| Wakabayashi <i>et al</i> [19]     | 24765539 | 2014             | Case Report   |
| Gulcicek <i>et al</i> [20]        | 27528817 | 2016             | Case Report   |
| Patnayak <i>et al</i> [21]        | 27512553 | 2016             | Case Report   |
| Modi <i>et al</i> [22]            | 26838004 | 2015             | Case Report   |
| Waagner <i>et al</i> [23]         | 26185704 | 2015             | Case Report   |
| Wu <i>et al</i> [24]              | 26181433 | 2015             | Case Report   |
| Mardi <i>et al</i> [25]           | 24455626 | 2013             | Case Report   |
| Little <i>et al</i> [26]          | 23709554 | 2013             | Case Report   |
| Tokuhara <i>et al</i> [27]        | 22350299 | 2012             | Case Report   |
| Karaca <i>et al</i> [32]          | 21166967 | 2010             | Case Report   |
| Callacondo <i>et al</i> [28]      | 19467693 | 2009             | Case Report   |
| Choi <i>et al</i> [29]            | 17443414 | 2007             | Case Report   |
| Yildirim <i>et al</i> [30]        | 16459645 | 2005             | Case Report   |
| Hara <i>et al</i> [31]            | 15065010 | 2004             | Case Report   |

**Supplementary Table 2** Data on the utilized chemotherapy and radiotherapy regimens

| First author [ref.]               | Neoadjuvant chemotherapy | Adjuvant chemotherapy                                       | Adjuvant radiation therapy dosing |
|-----------------------------------|--------------------------|-------------------------------------------------------------|-----------------------------------|
| Gao <i>et al</i> [13]             | None                     | None                                                        | None                              |
| Yamagata <i>et al</i> [14]        | None                     | S-1                                                         | None                              |
| Rojas <i>et al</i> [1]            | None                     | 5-fluorouracil                                              | None                              |
| Vailas <i>et al</i> [15]          | None                     | paclitaxel/carbopaltin                                      | None                              |
| Gonzalez-Sanchez <i>et al</i> [2] | None                     | n/a                                                         | None                              |
| Chang <i>et al</i> [16]           | None                     | 5-fluorouracil/cisplatin                                    | None                              |
| Gao <i>et al</i> [17]             | None                     | cisplatin/docetaxel                                         | None                              |
| Hwang <i>et al</i> [9]            | None                     | 5-fluorouracil/cisplatin                                    | None                              |
| Wang <i>et al</i> [18]            | None                     | cisplatin/docetaxel                                         | None                              |
| Chen <i>et al</i> [11]            | None                     | None (n=8)<br>Cisplatin-based or 5-fluorouracil-based (n=7) | 50.4 Gy in 28 fractions (n=1)     |
| Wakabayashi <i>et al</i> [19]     | None                     | None                                                        | None                              |
| Gulcicek <i>et al</i> [20]        | None                     | cisplatin/capecitabine                                      | 45 Gy in 25 fractions             |
| Patnayak <i>et al</i> [21]        | None                     | None                                                        | None                              |
| Modi <i>et al</i> [22]            | carboplatin/paclitaxel   | n/a                                                         | None                              |
| Waagner <i>et al</i> [23]         | None                     | capecitabine/oxaliplatin                                    | n/a                               |
| Wu <i>et al</i> [24]              | None                     | 5-fluorouracil/oxaliplatin                                  | None                              |
| Mardi <i>et al</i> [25]           | None                     | n/a                                                         | None                              |
| Little <i>et al</i> [26]          | None                     | n/a                                                         | None                              |
| Tokuhara <i>et al</i> [27]        | None                     | 5-fluorouracil/cisplatin                                    | None                              |
| Karaca <i>et al</i> [32]          | None                     | None                                                        | None                              |
| Callacondo <i>et al</i> [28]      | None                     | None                                                        | None                              |
| Choi <i>et al</i> [29]            | None                     | 5-fluorouracil/etoposide/cisplatin                          | None                              |
| Yildirim <i>et al</i> [30]        | None                     | 5-fluorouracil/cisplatin                                    | None                              |
| Hara <i>et al</i> [31]            | None                     | n/a                                                         | None                              |
